# Supplementary material for: Organic phosphorescent scintillation from copolymers by X-ray irradiation
Source: PubMed Central journal article supplement (PMC9271082; doi:10.1038/s41467-022-31554-3), 2022-07-09
Supplement: 41467_2022_31554_MOESM2_ESM.pdf [file 41467_2022_31554_MOESM2_ESM.pdf]

### **Description of Additional Supplementary Files**

File Name: Supplementary Movie 1

Description: Highly efficient room temperature phosphorescence of copolymer PBr-50 under ambient conditions excited by a 310 nm lamp.
